# Supplementary material for: Photosensing and quorum sensing are integrated to control Pseudomonas aeruginosa collective behaviors
Source: PLoS Biol. 2019 Dec 12;17(12):e3000579. doi: 10.1371/journal.pbio.3000579 (PMC6932827; doi:10.1371/journal.pbio.3000579)
Supplement: S3 Table — (DOCX) [file pbio.3000579.s010.docx]

**S3 Table. Bacterial strains used in this study.**

| **Strain** | **Description** | **Reference** |
| --- | --- | --- |
| UCBPP-PA14 | Wild type *Pseudomonas aeruginosa* | Laboratory stock |
| SM32 | Δ*rhlR* | [21] |
| SM1040 | Δ*rhlR* Δ*kinB* | This study |
| SM1050 | Δ*kinB* | This study |
| SM1111 | pUCP18-*Plac-kinB* | This study |
| SM1112 | Δ*rhlR* Δ*kinB* pUCP18*-Plac-kinB* | This study |
| SM1116 | Δ*kinB* pUCP18*-Plac-kinB* | This study |
| SM1204 | *algBSTOP* | This study |
| SM1212 | Δ*kinB algBSTOP* | This study |
| SM1278 | Δ*kinB bphPSTOP* | This study |
| SM1282 | *bphPSTOP* | This study |
| SM1286 | pUCP18*-Plac-algB* | This study |
| SM1303 | Δ*rhlR* pUCP18*-Plac-algB* | This study |
| SM1326 | *bphPSTOP* pUCP18-*Plac-algB* | This study |
| SM1377 | *3xFLAG-algB* | This study |
| SM1378 | Δ*kinB 3xFLAG-algB* | This study |
| SM1386 | Δ*kinB bphPH513A* | This study |
| SM1387 | *algBSTOP* pUCP18*-Plac-algB* | This study |
| SM1388 | *bphPH513A* pUCP18-*Plac-algB* | This study |
| SM1413 | *algBSTOP* pBBR1-MCS5*-Plac-3xFLAG-algB* | This study |
| SM1514 | *3xFLAG-algB kinB-SNAP* | This study |
| SM1523 | *3xFLAG-algB kinBP390S-SNAP* | This study |
| SM1535 | pBBR-MCS5*-Plac-bphP* | This study |
| SM1543 | *algBSTOP* pBBR1-MCS5-*Plac-bphP* | This study |
| SM1562 | *algBSTOP* pBBR1-MCS5-*Plac-3xFLAG-algBD59N* | This study |
| SM1563 | *algBSTOP* pUCP18-*Plac-algBD59N* | This study |
| SM1597 | *algBD59N* | This study |
| SM1598 | Δ*kinB algBD59N* | This study |
| SM1617 | *3xFLAG-algB bphP-3xFLAG* | This study |
| SM1618 | *3xFLAG-algB bphPH513A-3xFLAG* | This study |
